# Supplementary material for: Nucleotide-mediated SPDEF modulates TFF3-mediated wound healing and intestinal barrier function during the weaning process
Source: PubMed Central journal article supplement (PMC5859294; doi:10.1038/s41598-018-23218-4), 2018-03-19

# Nucleotide-mediated SPDEF modulates TFF3-mediated wound healing and intestinal barrier function during the weaning process

Sang In Lee and In Ho Kim\*

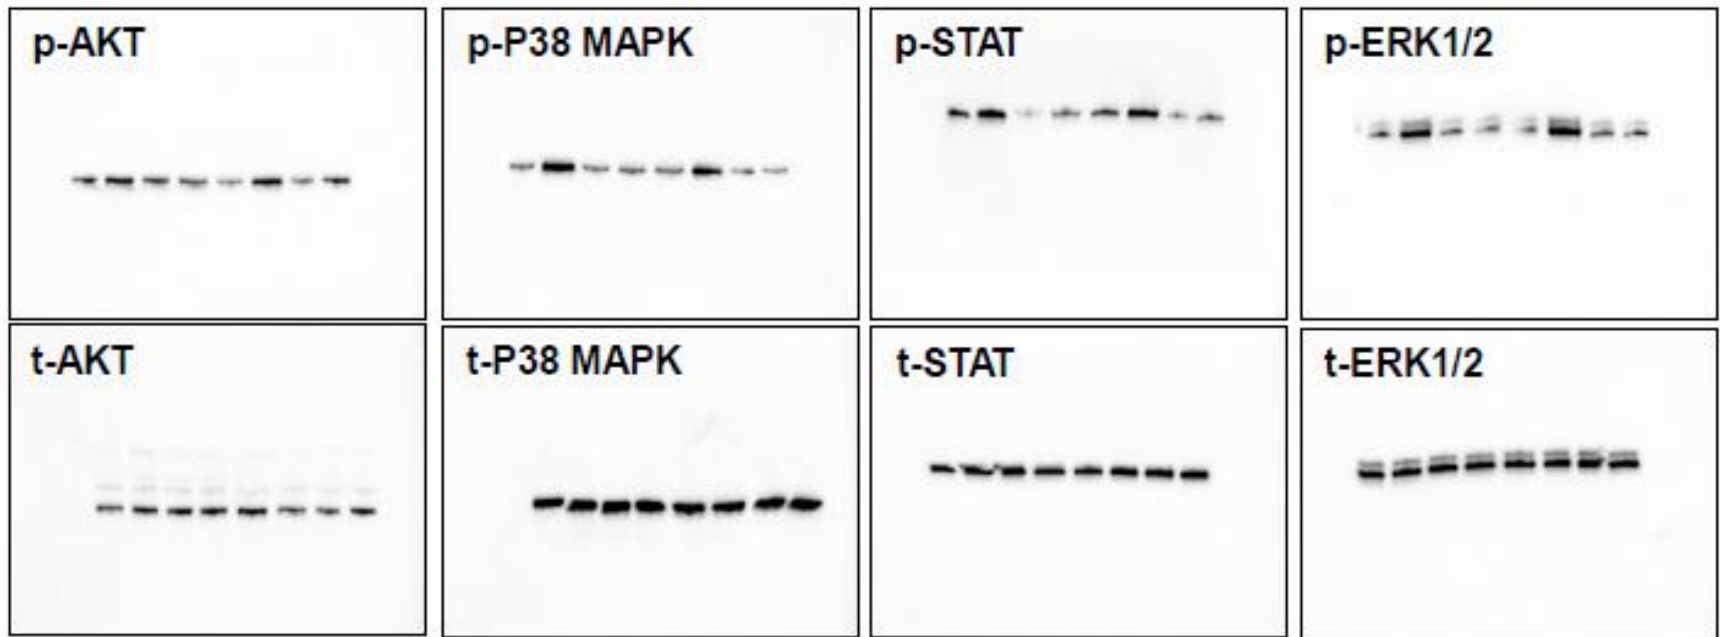

Supplement: 41598_2018_23218_MOESM8_ESM.pdf [file 41598_2018_23218_MOESM8_ESM.pdf]
